# Supplementary material for: Identification of a homozygous recessive variant in PTGS1 resulting in a congenital aspirin-like defect in platelet function
Source: PubMed Central journal article supplement — Haematologica. 2020 Apr 16;106(5):1423–32. doi: 10.3324/haematol.2019.235895 (PMC8094108; doi:10.3324/haematol.2019.235895), 2020-04-16
Supplement: 2019_235895-DisclosuresContributions.pdf [file 2019_235895-DisclosuresContributions.pdf]

Haematologica  
HAEMATOL/2019/235895  
Version 3

Identification of a homozygous recessive variant in *PTGS1* resulting in a congenital aspirin-like defect in platelet function

Melissa V Chan, Melissa A Hayman, Suthesh Sivapalaratnam, Marilena Crescente, Harriet E Allan, Matthew L Edin, Darryl C Zeldin, Ginger L Milne, Jonathan Stephens, Daniel Greene, Moghees Hanif, Valerie B O'Donnell, Liang Dong, Michael G Malkowski, Claire Lentaigne, Katherine Wedderburn, Matthew Stubbs, Kate Downes, Willem H Ouwehand, Ernest Turro, NIHR BioResource, Daniel P Hart, Kathleen Freson, Michael A Laffan, and Timothy D Warner

Disclosures: Melissa V. Chan: None Melissa A. Hayman: None Suthesh Sivapalaratnam: None Marilena Crescente: None Harriet E. Allan: None Matthew L. Edin: None Darryl C. Zeldin: None Ginger L. Milne: None Jonathan Stephens: None Daniel Greene: None Moghees Hanif: None Valerie B. O'Donnell: None Liang Dong: None Michael G. Malkowski: None Claire Lentaigne: None Katherine Wedderburn: None Matthew Stubbs: None Kate Downes: None Willem H. Ouwehand: None Ernest Turro: None NIHR BioResource: None Daniel P. Hart: None Kathleen Freson: None Michael A. Laffan: None Timothy D. Warner: None

Contributions: MVC, MAH, SS, MC, MEA, MLE, DCZ, GLM, JS, DG, MH, VBO, LD, MGM, CL, KW, MS, KD, DPH and KF designed and performed experiments, MVC, MAH, SS, MC, MEA, MLE, GLM, VBO and LD performed data analysis, MVC, MAH, SS, MAL and TDW wrote the manuscript, VBO, WHO, ET, KF, MAL and TDW supervised the study, and all authors reviewed the manuscript.
